# Supplementary material for: NOTCH3-targeted antibody drug conjugates regress tumors by inducing apoptosis in receptor cells and through transendocytosis into ligand cells
Source: PubMed Central journal article supplement — Cell Rep Med. 2021 May 18;2(5):100279. doi: 10.1016/j.xcrm.2021.100279 (PMC8149476; doi:10.1016/j.xcrm.2021.100279), 2021-05-18
Supplement: mmc1.pdf [file mmc1.pdf]

**Cell Reports Medicine, Volume 2**

**Supplemental information**

**NOTCH3-targeted antibody drug conjugates regress  
tumors by inducing apoptosis in receptor cells  
and through transendocytosis into ligand cells**

**Kenneth G. Geles, Yijie Gao, Andreas Giannakou, Latha Sridharan, Ting-Ting Yamin, Jing Zhang, Rieyz Karim, Joel Bard, Nicole Piche-Nicholas, Manoj Charati, Andreas Maderna, Judy Lucas, Jonathon Golas, Magali Guffroy, Steven Pirie-Shepherd, Marc Roy, Jessie Qian, Tania Franks, Wenyan Zhong, Christopher J. O'Donnell, Lioudmila Tchistiakova, Hans-Peter Gerber, and Puja Sapra**

**A**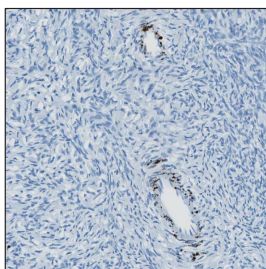

Normal Ovary  
*NOTCH3* ISH

**B**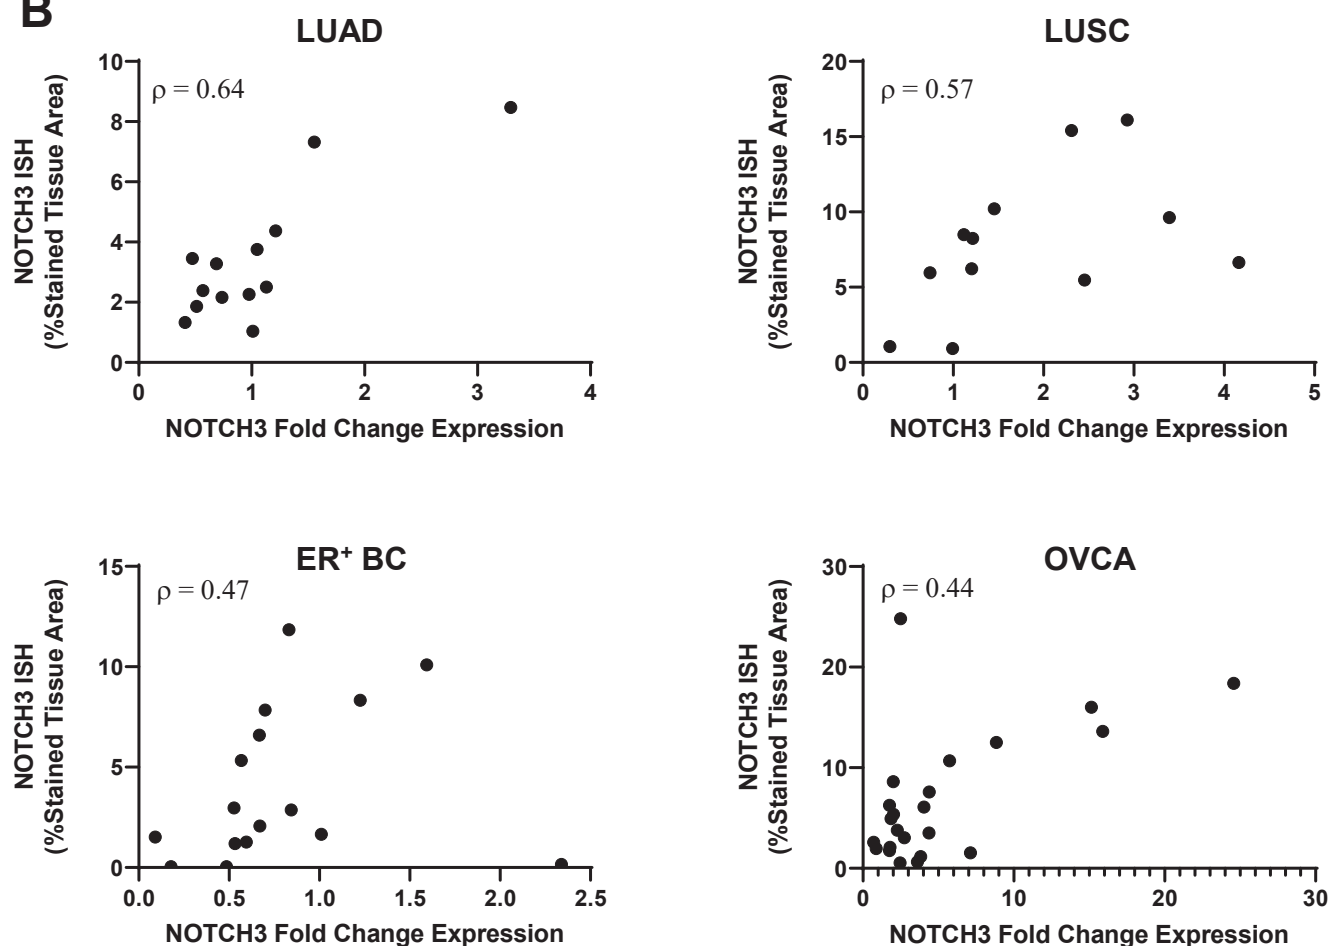

**Figure S1. *NOTCH3* is Overexpressed in Multiple Human Tumors. Related to Figure 1.**

(A) *NOTCH3* ISH staining in a normal ovarian tissue section. (B) Spearman's correlation plots of primary human tumor *NOTCH3* ISH quantitation versus qRT-PCR data. Correlation of the ISH and qRT-PCR data shows positive correlation between these two endpoints for each tumor set evaluated. Additionally, the qRT-PCR data and digital image analysis of *NOTCH3* ISH staining on sections of each tumor report a range of *NOTCH3* expression in each tumor type.

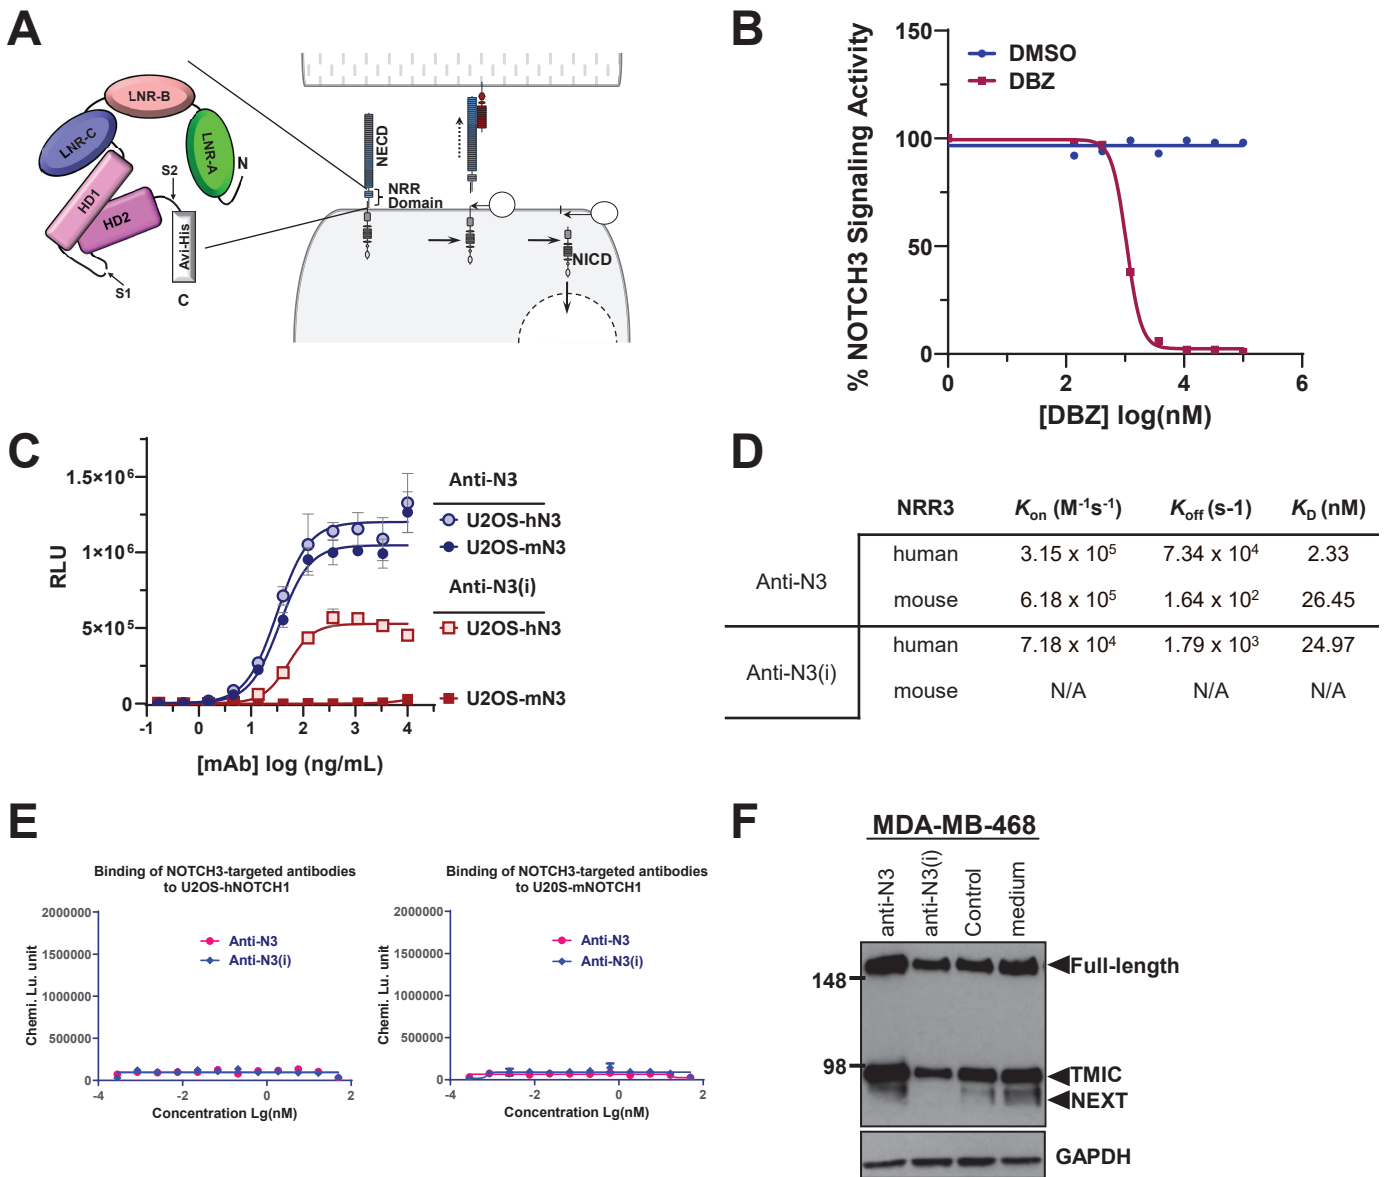

**Figure S2. Generation and Characterization of Therapeutic Anti-NOTCH3 mAbs. Related to Figure 2.**

(A) Schematic of recombinant NRR domain generated from human or mouse NOTCH3 that was used for immunization of rats in relation to the full-length NOTCH3 receptor expressed on the cell surface. Following ligand binding, the NOTCH3 receptor undergoes a series of proteolytic cleavage events within the NRR leading to nuclear translocation of the NICD in the receptor cell and transendocytosis and internalization of the NECD into the ligand-expressing cell. (B) NOTCH3-dependent report gene assay in U2OS-hN3 Luc-reporter cells with  $\gamma$ -secretase inhibitor DBZ and DMSO control. Data represents mean  $\pm$  SD ( $n = 3$ ). (C) Cell surface binding ELISAs in which NOTCH3-targeted mAbs were tested for their binding to U2OS cells overexpressing human NOTCH3 (U2OS-hN3) or mouse NOTCH3 (U2OS-mN3), RLU = relative luminescence units. Data represents mean  $\pm$  SD of 3 biological replicates ( $n = 3$  per replicate). (D) The kinetic constants of the interactions between human or mouse NOTCH3 NRR and NOTCH3-targeted mAbs were determined by surface plasmon resonance (Biacore® T100, Biacore Inc., Piscataway, NJ).  $K_{on}$ , association rate or on rate;  $K_{off}$ , dissociation rate or off rate;  $K_D$ , dissociation constant which is calculated as  $K_{off}/K_{on}$ . (E) Cell surface binding ELISAs in which NOTCH3-targeted mAbs were tested for their binding to U2OS cells overexpressing human NOTCH1 (U2OS-hNOTCH1) or mouse NOTCH1 (U2OS-mNOTCH1). Representative data represents mean ( $n = 2$ ). (F) Immunoblot using a C-terminal domain antibody to detect basal NOTCH3 signaling from MDA-MB-468 breast cancer cells following treatment with anti-NOTCH3 or control mAbs. GAPDH is shown as a loading control.

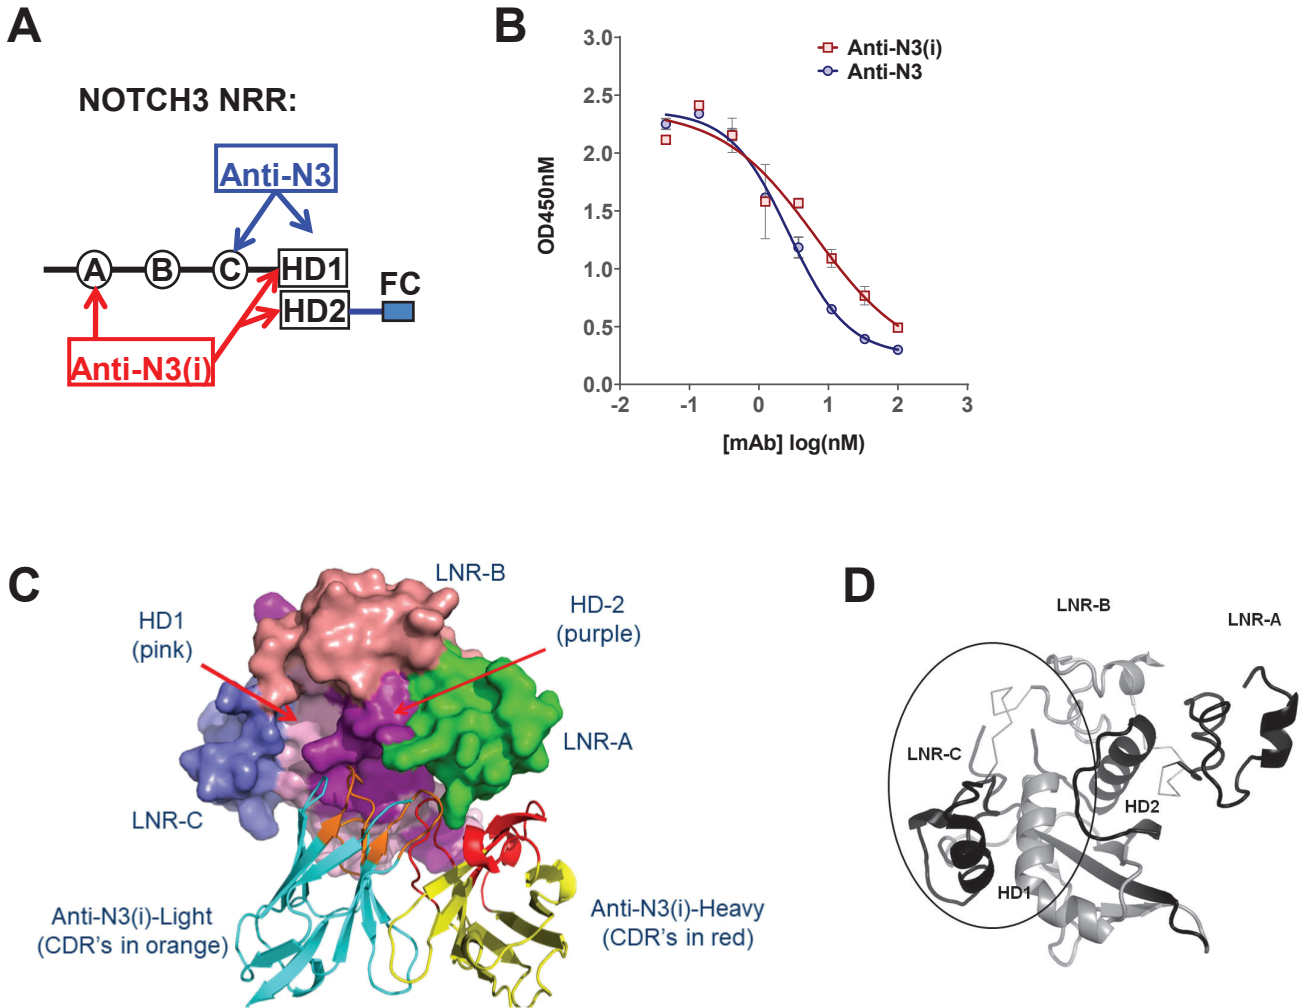

**Figure S3. Generation and Characterization of Therapeutic Anti-NOTCH3 mAbs. Related to Figure 2.**

(A) Diagram of heterodimeric NOTCH3 NRR that consists of the N-terminal polypeptide encompassing LNR-A, -B, -C and HD1 domains, and a C-terminal part containing HD2 domain fused with human IgG1 Fc fragment for ease of expression and purification. Two sub-domains are essential for anti-N3 binding to NOTCH3, the LNR-C and the HD1 domains. Three sub-domains are essential for anti-N3(i) binding to NOTCH3, the LNR-A, HD1 and HD2 domains. Components represented in the diagram are not proportional to their actual size. (B) Competition ELISA of NOTCH3-targeted mAbs with biotinylated anti-N3 on U2OS-hN3 cells. Representative data represents mean  $\pm$  SEM ( $n=2$ ). (C) Structure of anti-N3(i) variable domain bound to NOTCH3 NRR. The heavy (yellow) and light (cyan) chain variable domains of mAb clone 75 are shown as ribbons. The NOTCH3 NRR is shown as a Van der Waals surface colored by sub-domain as shown. Anti-N3(i) heavy chain CDRs (red) bind to the NOTCH3 NRR LNR-A and HD-2 subdomains while anti-N3(i) light chain CDRs (orange) binds to the HD-1 and HD-2 subdomains. (D) Crystal structure of the NOTCH3 NRR showing expected anti-N3 binding epitope. LNR-A, LNR-C, and HD1 are shown in black. LNR-B and HD2 are shown in gray. The linkers between the LNR regions are shown as thin ribbons. The large ellipse encloses the expected epitope for anti-N3, based on epitope mapping using NOTCH3-NOTCH1 chimeric constructs.



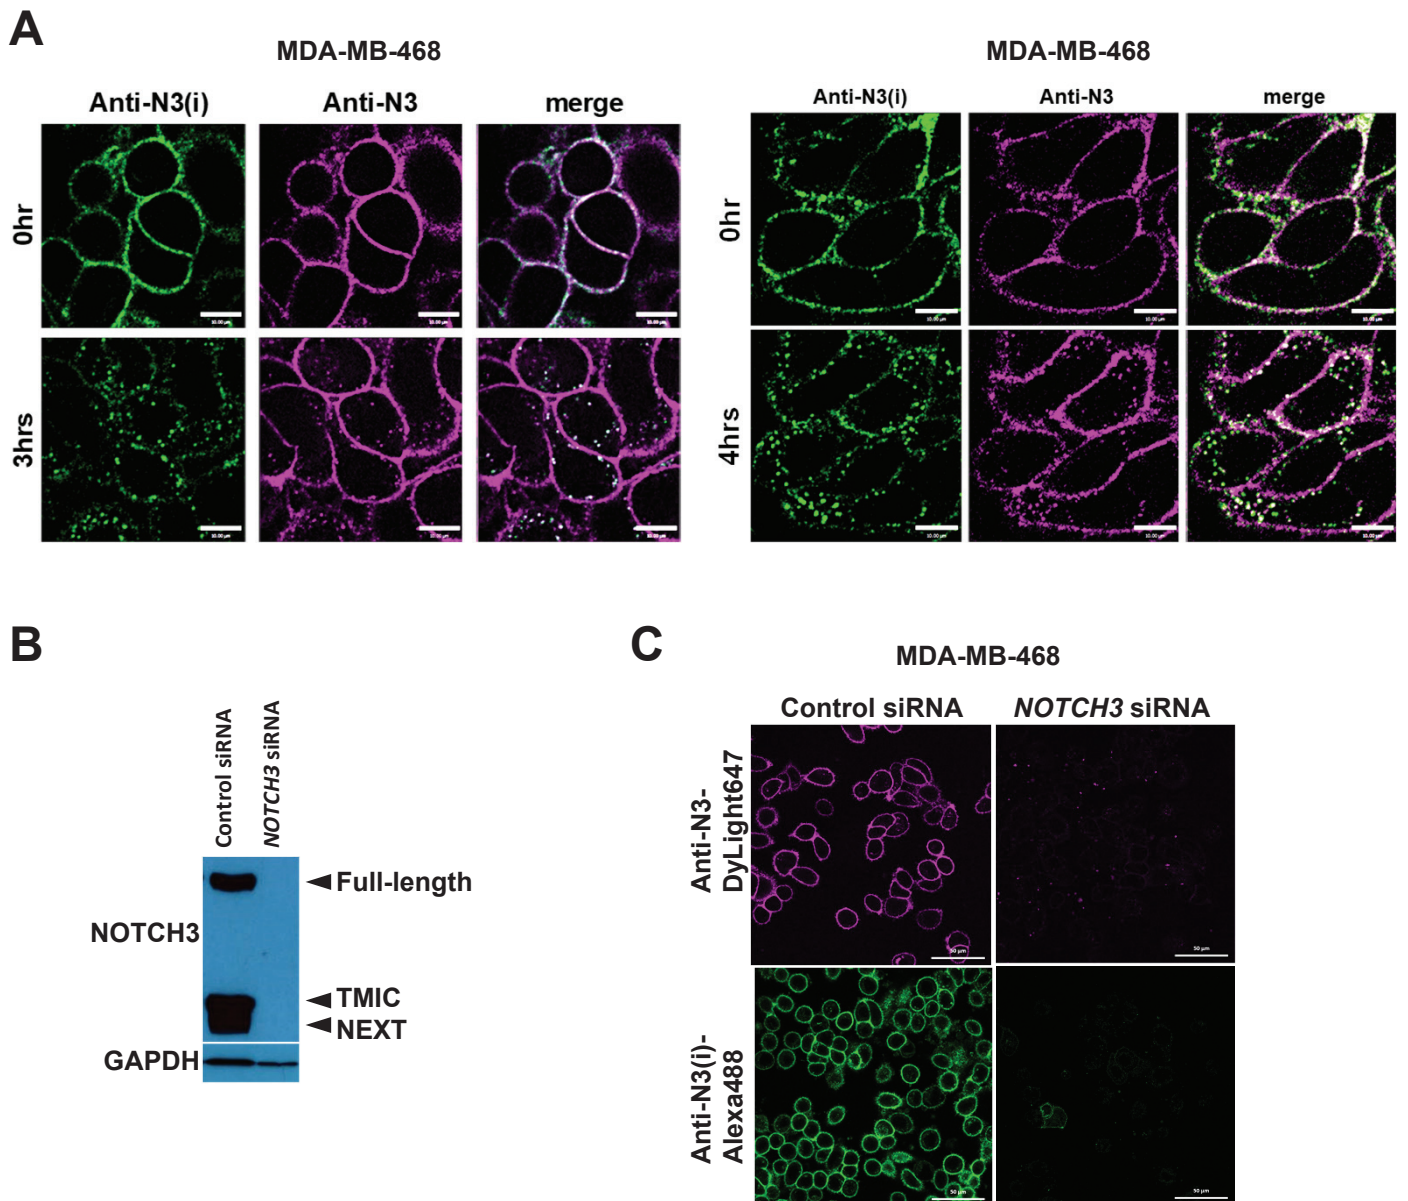

**Figure S4. Cell Membrane Distribution of Anti-NOTCH3 mAbs Depends on Signaling Status. Related to Figure 3.**

(A) Additional examples of single optical sections from live cell confocal imaging of NOTCH3-targeted mAbs simultaneously bound to MDA-MB-468 cells and imaged over time. Anti-N3(i)-Alexa 488 (green), anti-N3-DyLight647 (magenta), scale bar, 10  $\mu\text{m}$ . (B) Immunoblot of NOTCH3 using a C-terminal domain antibody from MDA-MB-468 breast cancer cells following siRNA knockdown of *NOTCH3* expression. GAPDH is shown as a loading control. (C) Single optical sections from confocal imaging of NOTCH3-targeted mAbs bound to fixed MDA-MB-468 cells after siRNA knockdown of *NOTCH3* expression. Anti-N3(i)-Alexa488 (green), anti-N3-DyLight647 (magenta), scale bar, 50  $\mu\text{m}$ .

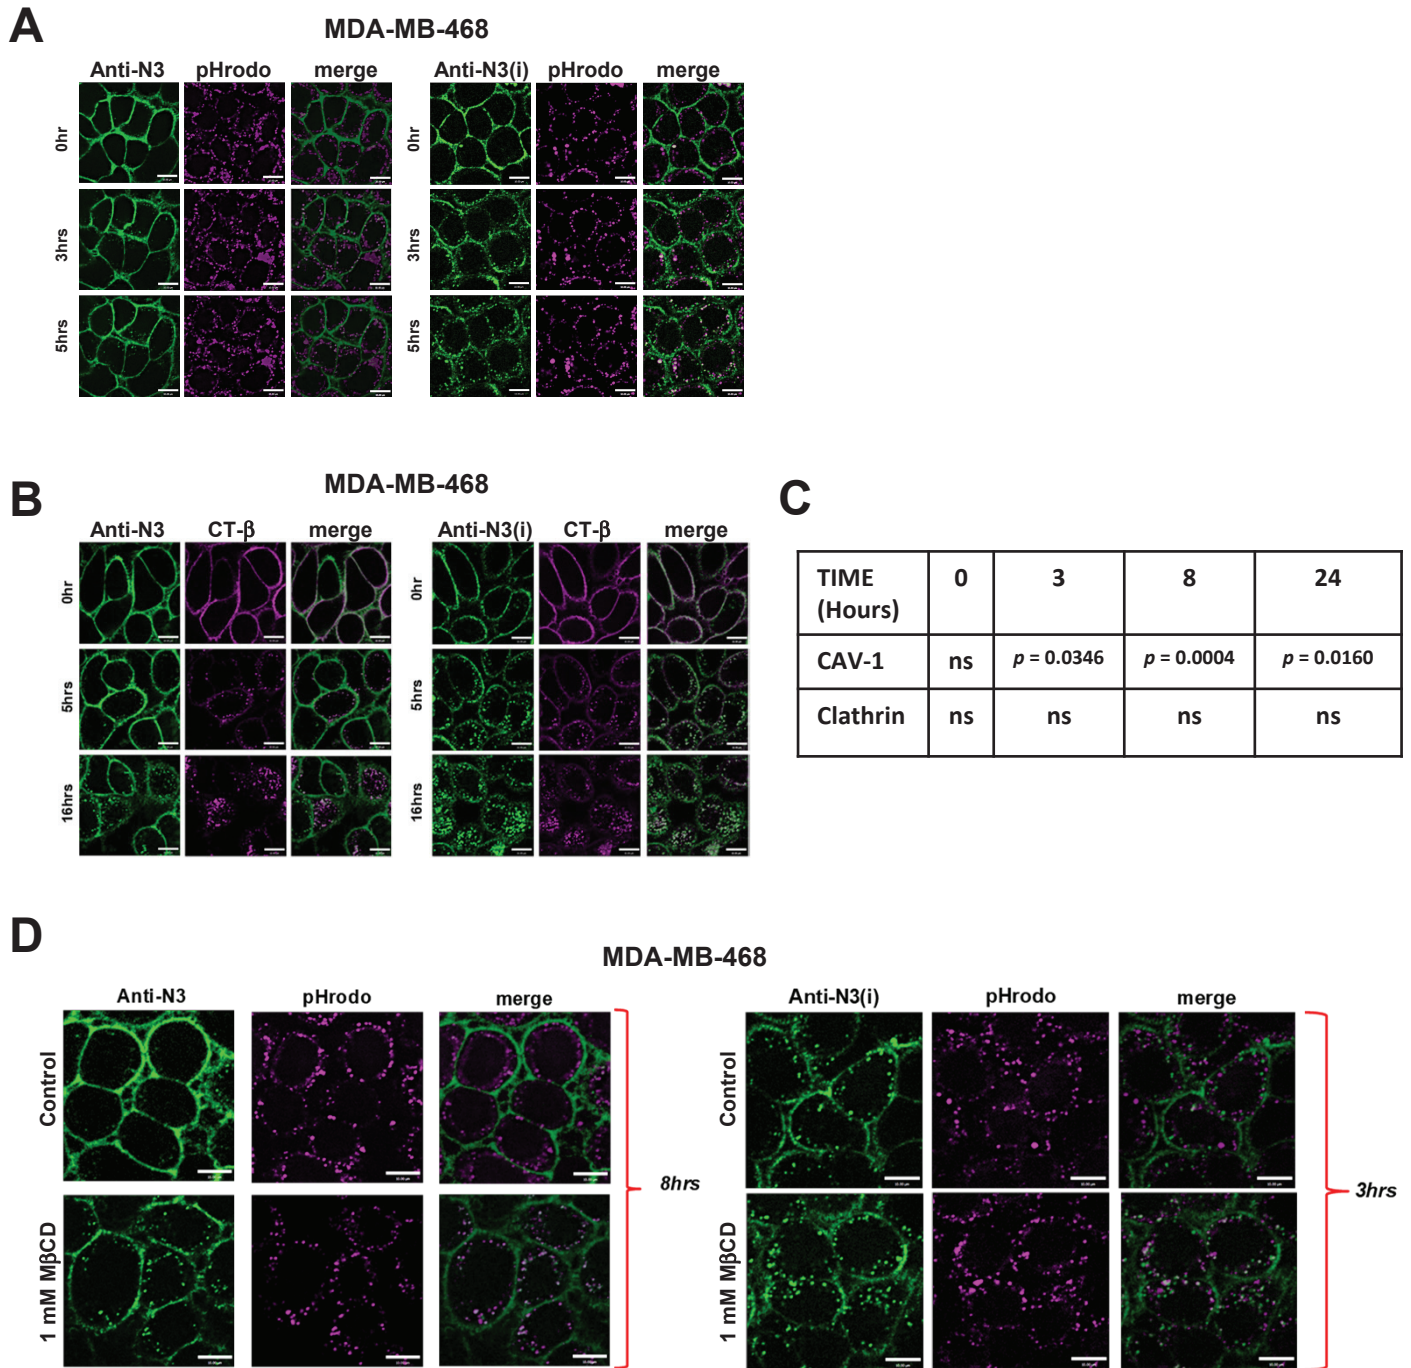

**Figure S5. Anti-NOTCH3 mAbs have Differential Rates of Endocytosis and Lysosomal Trafficking. Related to Figure 4.**

(A) Additional examples of single optical sections from live cell confocal imaging of NOTCH3-targeted mAbs colocalized with pHrodo red dextran in MDA-MB-468 cells over time and used to generate graphs in Figure 4A. (B) Additional example of single optical sections from live cell confocal imaging of NOTCH3-targeted mAbs colocalized with CT- $\beta$  in MDA-MB-468 cells over time and used to generate graphs in Figure 4C. (C) Statistical analysis of MCC values generated from anti-N3 vs anti-N3(i) co-localization with anti-CAV1 or anti-clathrin antibodies using an unpaired t-test, ns, non-significant. (D) Additional example of single optical sections from live cell confocal imaging of NOTCH3-targeted mAbs colocalized with pHrodo-Red dextran in M $\beta$ CD treated MDA-MB-468 cells over time and used to generate graphs in Figure 4F. Scale bar, 10  $\mu$ m in all panels.



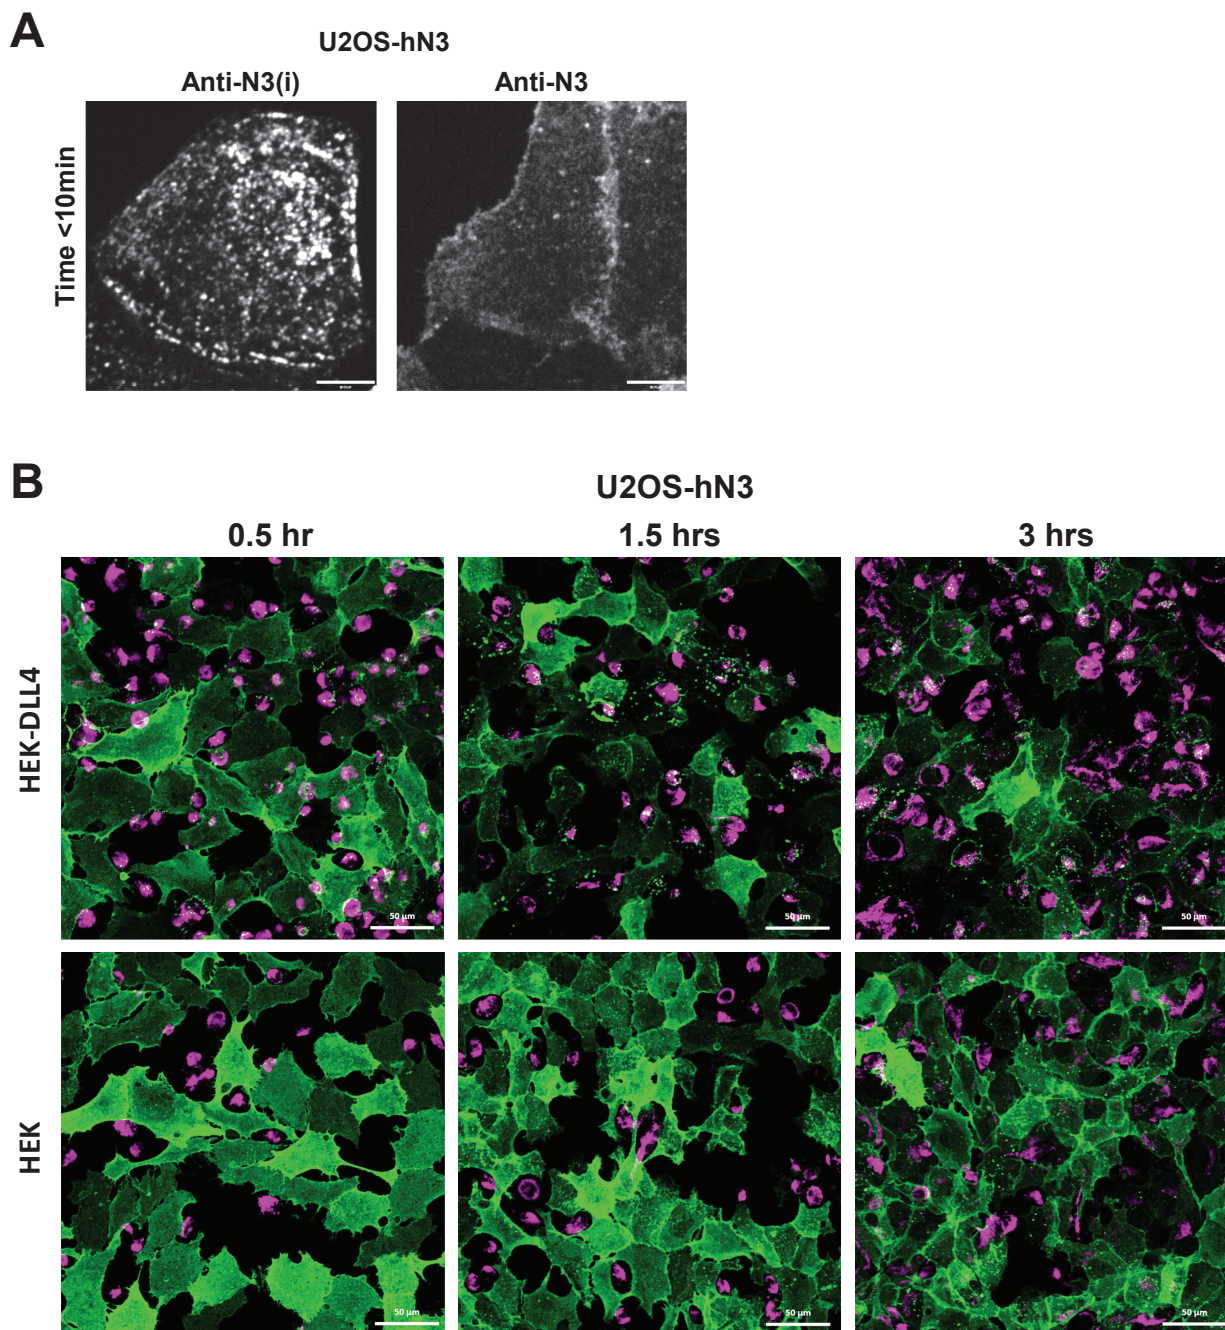

**Figure S6. Anti-NOTCH3 mAbs Transendocytose into DLL4 Ligand-expressing Cells. Related to Figure 5.**

(A) Maximum intensity projections from live cell confocal imaging of NOTCH3-targeted mAbs that were bound to U2OS-hN3 cells and then co-cultured with HEK-DLL4 cells. Images are examples of U2OS-hN3 cells that were not in contact with HEK-DLL4 cells. Scale bar, 10  $\mu\text{m}$ . (B) Confocal images of U2OS-hN3 cells that were bound by the anti-N3 mAb and co-cultured with HEK-control or HEK-DLL4 cells (magenta) that were then fixed and stained at the indicated time points. The anti-N3 mAb was detected by indirect immunofluorescence (green). Scale bar = 50  $\mu\text{m}$ .

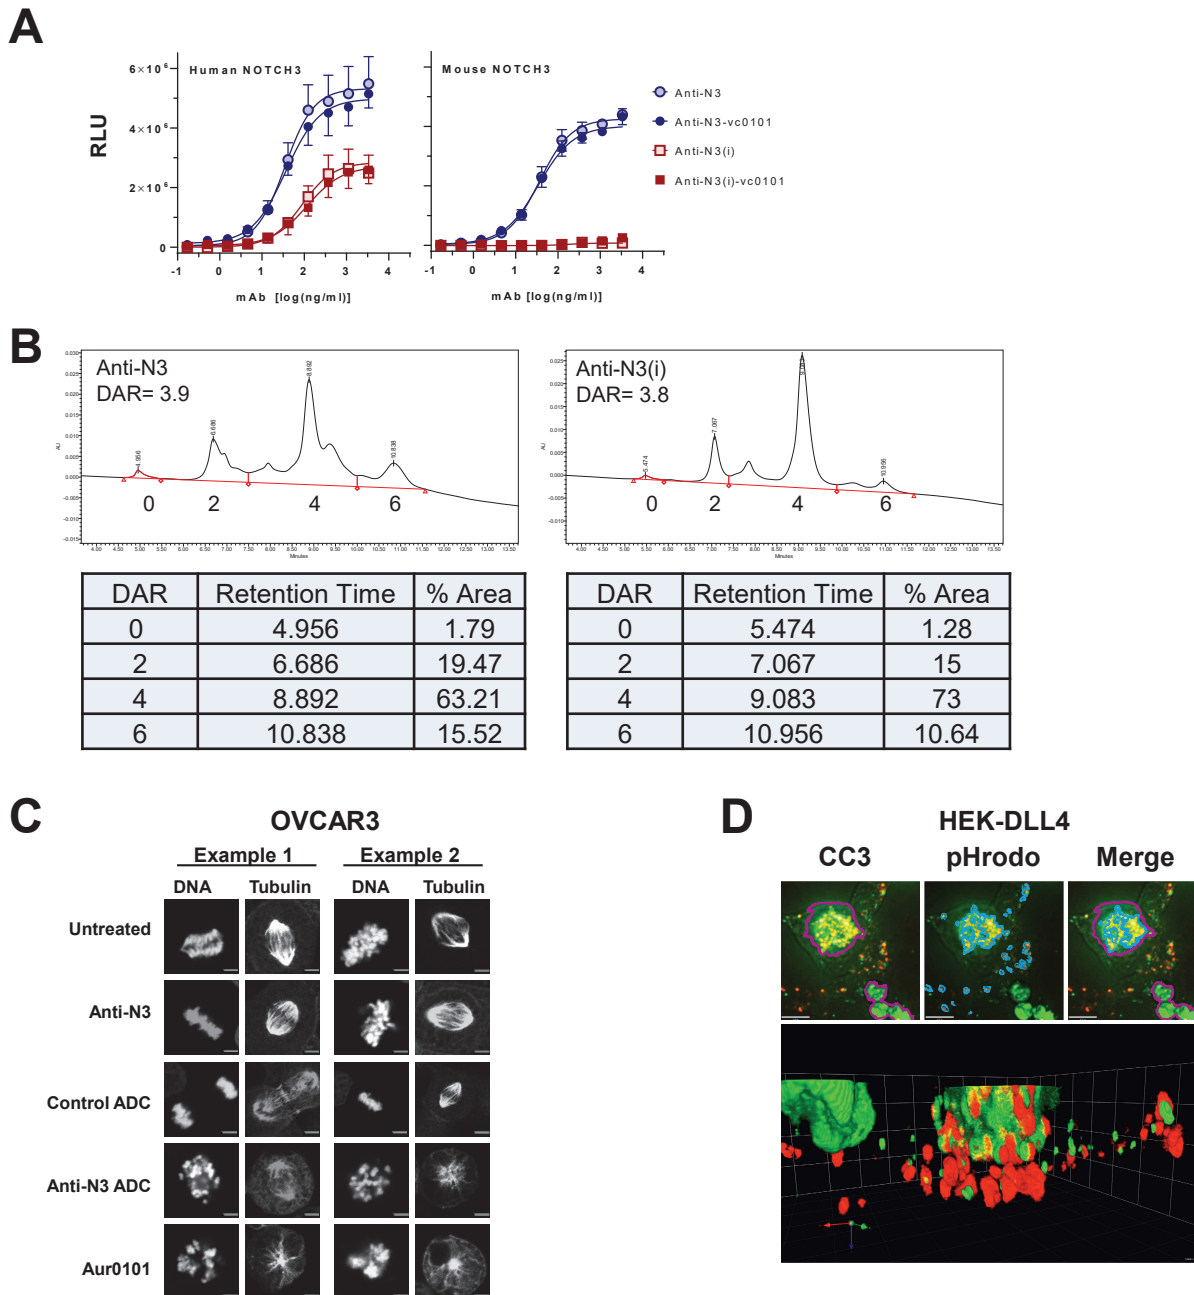

**Figure S7. NOTCH3-targeted ADCs induce Cytotoxicity in Both Receptor and Ligand Cells. Related to Figure 6.**

(A) Cell surface binding ELISAs in which NOTCH3-targeted mAbs were directly compared to NOTCH3-ADCs for their binding to U2OS cells overexpressing human NOTCH3 or mouse NOTCH3. Data represents mean  $\pm$  SD from 3 biological replicates ( $n = 3$  per replicate), RLU = relative luminescence units. (B) Drug-to-antibody ratios (DAR) and distributions for representative batches of NOTCH3-targeted ADCs as analyzed by hydrophobic interaction chromatograph. (C) OVCAR3 cells were treated for 48 hrs with 1 mg/mL of anti-N3 mAb, anti-N3 ADC, control ADC, and 0.1 nM free auristatin payload (PF-06380101). Cells were fixed, permeabilized and processed for immunofluorescence staining with anti- $\alpha$ -tubulin antibody and DAPI to stain DNA. Images were acquired with an 63X objective (2X magnification) on a Zeiss LSM510 laser scanning confocal microscope. Scale bar = 5  $\mu$ m. (D) z stack of maximum intensity projections from live cell confocal imaging of anti-N3 ADC bound to U2OS-hN3 cells and co-cultured with HEK-DLL4 cells labeled with pHrodo Red dextran. Caspase compartments (magenta line), pHrodo Red dextran compartments (blue line) and the merged image.



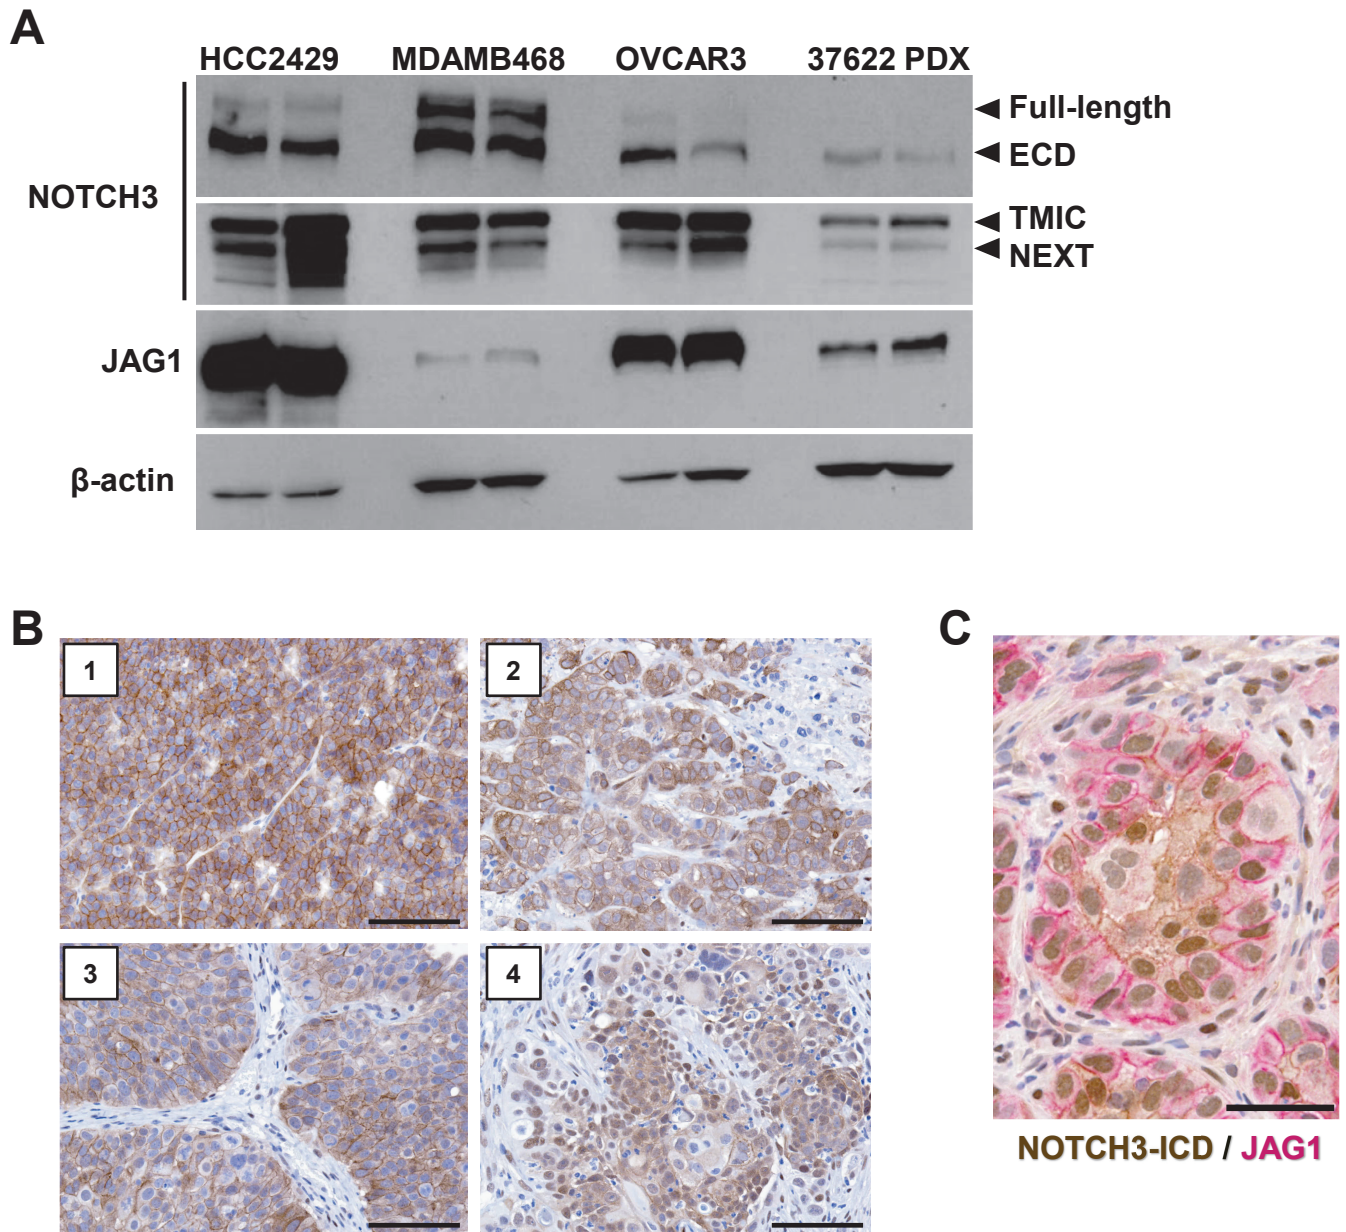

**Figure S8. NOTCH3-targeted ADCs induce Prolonged Tumor Regressions. Related to Figure 7.**

(A) Extracts from 2 individual tumor xenografts were immunoblotted with antibodies specific to the N-terminal NOTCH3 extracellular domain (NECD), the C-terminal NOTCH3 intracellular domains (TMIC/NEXT), JAG1 ligand and  $\beta$ -actin as a control. (B) Immunohistochemistry was performed on tumor xenografts using the C-terminal anti-NOTCH3 intracellular domain antibody that detected membrane-associated, cytoplasmic and nuclear NOTCH3 in (1) HCC2429 model; (2) MDA-MB-468 model; (3) OVCAR3 model; and (4) 37622 PDX model. Scale bar, 100  $\mu$ m. (C) Immunohistochemistry was performed on the 37622 PDX model and co-stained brown with the C-terminal anti-NOTCH3 intracellular domain antibody that detected membrane-associated, cytoplasmic and nuclear NOTCH3 and magenta with an anti-JAG1 antibody. Scale bar, 50  $\mu$ m.

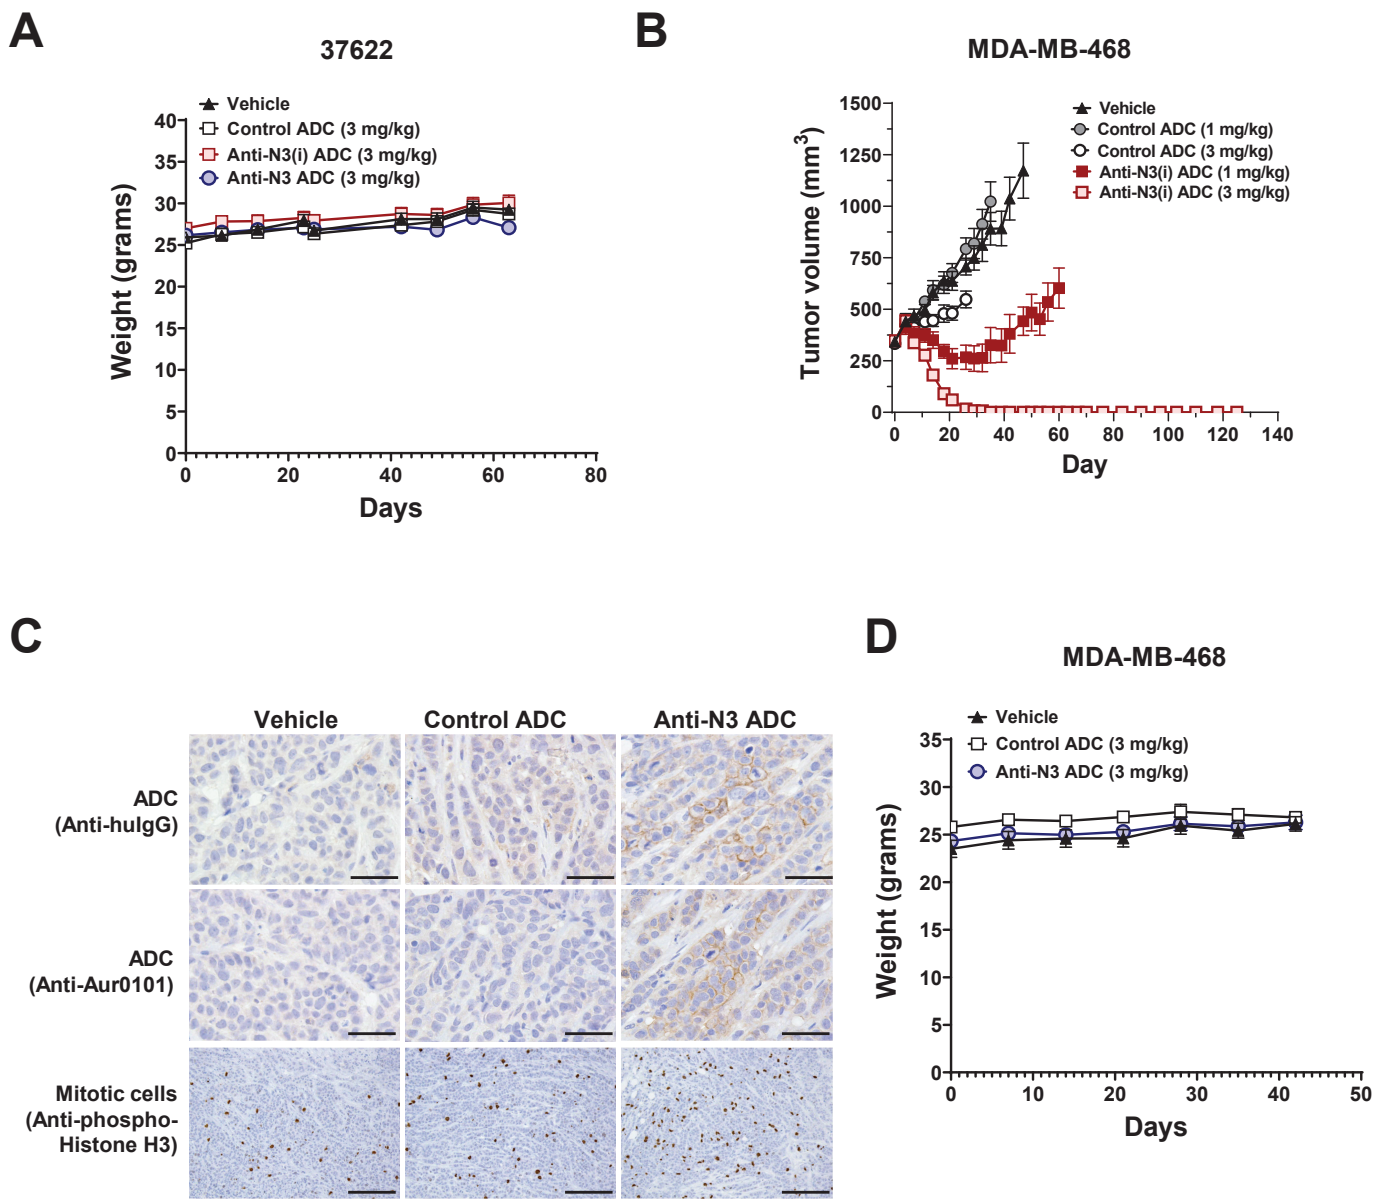

**Figure S9. NOTCH3-targeted ADCs induce Prolonged Tumor Regressions. Related to Figure 7.**

(A) Athymic nu/nu mouse body weights from NOTCH3-targeted or control ADC-treated 37622 PDX model dosed at 3 mg/kg every 4 days for 4 times starting at day 0. Data represent mean  $\pm$  SEM (n = 9-10 per group). (B) Tumor growth inhibition of MDA-MB-468 CLX model treated with the anti-N3(i) ADC or control ADC dosed at 1 or 3 mg/kg every 4 days for 4 times starting at day 0. Data represent mean  $\pm$  SEM (n = 7-8 per group). (C) Mice bearing MDA-MB-468 tumor xenografts were randomized into cohorts according to tumor volumes and dosed once intravenously with 3 mg/kg anti-N3 ADC, 3 mg/kg Control ADC or vehicle. After 24 hours, tumors were harvested, processed for immunohistochemistry and stained with anti-human IgG or anti-Aur0101 to detect the ADC, and anti-phospho-histone H3 to detect mitotic cells. Scale bar, 50  $\mu$ m for IHC of ADC, and 200  $\mu$ m for IHC of mitotic cells. (D) SHO mouse body weights from anti-N3 ADC or control ADC-treated MDA-MB-468 CLX model dosed at 3 mg/kg every 4 days for 4 times starting at day 0. Data represent mean  $\pm$  SEM (n = 7-8 per group).

**Table S1. Crystallographic Statistics. Related to Figure 2.**

|                                       | Notch3/anti-N3(i) Fab Complex                 |
|---------------------------------------|-----------------------------------------------|
| <b>Data collection</b>                |                                               |
| Space Group                           | P2 <sub>1</sub> 2 <sub>1</sub> 2 <sub>1</sub> |
| Cell dimensions                       |                                               |
| a, b, c (Å)                           | 133.65Å 158.95Å 159.69Å                       |
| α, β, γ                               | 90.00° 90.00° 90.00°                          |
| Resolution (Å)                        | 112.66 – 2.98                                 |
| $R_{\text{merge}}^b$                  | 0.19 (1.099)                                  |
| $I / \sigma I$                        | 10.0 (1.7)                                    |
| Completeness (%)                      | 99.9 (100.0)                                  |
| Redundancy                            | 6.7 (6.7)                                     |
| <b>Refinement</b>                     |                                               |
| Resolution (Å)                        | 112.66 – 2.98                                 |
| No. reflections                       | 70204 (3541)                                  |
| $R_{\text{work}} / R_{\text{free}}^c$ | 0.233/0.256                                   |
| No. atoms                             | 18917                                         |
| Protein                               | 18838                                         |
| Ion                                   | 69                                            |
| Solvent                               | 10                                            |
| Mean <i>B</i> Value                   | 57.74                                         |
| R.M.S. Deviations                     |                                               |
| Bond lengths (Å)                      | 0.008                                         |
| Bond angles (°)                       | 1.04                                          |

a Values in parentheses are for highest-resolution shell.

b  $R_{\text{merge}} = \sum |I - \langle I \rangle| / \sum I$ , where *I* is observed intensity and  $\langle I \rangle$  is average intensity obtained from multiple observations of symmetry related reflections.

c  $R_{\text{work}} = \sum ||F_o| - |F_c|| / \sum |F_o|$ , where  $F_o$  and  $F_c$  are observed and calculated structure factor amplitudes respectively.  $R_{\text{free}} = R_{\text{work}}$ , calculated using random reflections omitted from the refinement (number of reflections given in parentheses).
